# Supplementary material for: Influence of Husband Consent to Family Planning and Spousal Communication on the Use of Family Planning among Young Mothers in Peri-Urban, Nigeria
Source: Preprints.org preprint supplement (doi:10.20944/preprints202009.0148.v1), 2020-09-06
Supplement: Supplementary file 1 [file supplementary]

# QUESTIONNAIRE

## DEPARTMENT OF DEMOGRAPHY AND SOCIAL STATISTICS OBAFEMI AWOLOUNIVERSITY, ILE-IFE, OSUN STATE

**Instruction:** please Tick [✓] the box that represent your perception, experience or observation and write where necessary in the following question.

### SECTION A: Socio-Demographic Characteristics

| S/N | Questions                                                                                         | Coding Categories                                                                                                  | Skip                           |
|-----|---------------------------------------------------------------------------------------------------|--------------------------------------------------------------------------------------------------------------------|--------------------------------|
| 1.  | How old were you at the time you gave birth to your last/youngest child?                          | .....                                                                                                              |                                |
| 2.  | How old was your husband at the time you gave birth to your youngest child?                       | .....                                                                                                              | If don't know, put present age |
| 3.  | How many Child/Children do you have?                                                              | .....                                                                                                              |                                |
| 4.  | Family type                                                                                       | 1. Monogamous [ ]<br>2. Polygamous [ ]                                                                             |                                |
| 5.  | What is your religious affiliation?                                                               | 1. Christianity [ ]<br>2. Islamic [ ]<br>3. Traditional [ ]<br>88. Others [ ] (Specify) .....                      |                                |
| 6.  | What is your Husband's religion?                                                                  | 1. Christianity [ ]<br>2. Islamic [ ]<br>3. Traditional [ ]<br>88. Others [ ] (Specify) .....                      |                                |
| 7.  | What was your highest level of education at the time you gave birth to your last child?           | 1. No for education [ ]<br>2. Primary [ ]<br>3. Secondary [ ]<br>4. Tertiary [ ]<br>88. Others [ ] (Specify) ..... |                                |
| 8.  | What was your husband's highest level of education at the time you gave birth to your last child? | 1. No for education [ ]<br>2. Primary [ ]<br>3. Secondary [ ]<br>4. Tertiary [ ]<br>88. Others [ ] (Specify) ..... |                                |
| 9.  | What Ethnic group do you belong to?                                                               | 1. Hausa [ ]<br>2. Igbo [ ]<br>3. Yoruba [ ]<br>88. Other [ ] (Specify) .....                                      |                                |
| 10. | What Ethnic group does your Husband belong to?                                                    | 1. Hausa [ ]<br>2. Igbo [ ]<br>3. Yoruba [ ]<br>88. Others [ ] (Specify) .....                                     |                                |

|     |                                                                                                               |                                                                                                                                                                                                                 |  |
|-----|---------------------------------------------------------------------------------------------------------------|-----------------------------------------------------------------------------------------------------------------------------------------------------------------------------------------------------------------|--|
| 11. | Was your partner living with you when you were pregnant or staying somewhere else during your last pregnancy? | 1. Living with you [ ]<br>2. Somewhere else [ ]                                                                                                                                                                 |  |
| 12. | What was your occupation at the time you gave birth to your last child?                                       | 1. Unemployed [ ]<br>2. Full Housewife [ ]<br>3. Self-employed [ ]<br>4. Artisan [ ]<br>5. Farming [ ]<br>6. Trading [ ]<br>7. Government employed [ ]<br>8. Private employed [ ]<br>88. Others (specify) ..... |  |
| 13. | What was husband's occupation at the time you gave birth to your last child?                                  | 1. Unemployed [ ]<br>2. Driver [ ]<br>3. Self-employed [ ]<br>4. Artisan [ ]<br>5. Farming [ ]<br>6. Trading [ ]<br>7. Government employed [ ]<br>8. Private employed [ ]<br>88. Others (specify) .....         |  |
| 14a | Your last child, is he/she your first child?                                                                  | 1. Yes [ ]<br>2. No [ ]                                                                                                                                                                                         |  |
| 14b | If "No" to <b>Q14a</b> , what is the order of the child?                                                      | .....                                                                                                                                                                                                           |  |

### SECTION B: COMMUNICATION

| S/N | Questions                                                                                                        | Coding Categories                                                                                                                                                  | Skip                              |
|-----|------------------------------------------------------------------------------------------------------------------|--------------------------------------------------------------------------------------------------------------------------------------------------------------------|-----------------------------------|
| 15. | Who was the first person you informed of your recent/last pregnancy when you discovered?                         | 1. My Husband [ ]<br>2. Mother in-law [ ]<br>3. My mother [ ]<br>4. Traditional Birth Attendant [ ]<br>5. Someone else [ ] Specify .....<br>77. Can't remember [ ] |                                   |
| 16. | Tell us the reason(s) for informing such a person first.                                                         | .....                                                                                                                                                              |                                   |
| 17. | Did you discuss pregnancy and delivery issues ( <b>such as ANC, during your last pregnancy/after delivery?</b> ) | 1. Yes [ ]<br>2. No [ ]<br>77. Can't remember [ ]                                                                                                                  | <i>if Yes skip to Q19</i>         |
| 18. | If your answer to <b>Q17</b> is No, why?                                                                         | .....                                                                                                                                                              | <i>If No in Q17, skip to Q22.</i> |
| 19. | For how long does discussion with your husband on pregnancy issue usually last during your last pregnancy?       | 1. Regularly [ ]<br>2. Rarely [ ]<br>3. When the need arises [ ]<br>4. Not at all [ ]                                                                              |                                   |

|     |                                                                                                                                                                                                                                                                                                           |                                                                                                                                                                                                                                       |  |
|-----|-----------------------------------------------------------------------------------------------------------------------------------------------------------------------------------------------------------------------------------------------------------------------------------------------------------|---------------------------------------------------------------------------------------------------------------------------------------------------------------------------------------------------------------------------------------|--|
| 20. | For how long does discussion with your husband on pregnancy issues usually last during your last pregnancy?                                                                                                                                                                                               | 1. Less than 20 minutes [ ]<br>2. Up to 30 minutes [ ]<br>3. Almost an hour [ ]<br>4. More than 1 hour [ ]<br>5. No time bad [ ]<br>77. can't remember/estimate [ ]                                                                   |  |
| 21. | Which of the following is applicable when discussing with your husband about pregnancy and delivery issues during your last pregnancy?<br><br><i>Tick as many as possible</i>                                                                                                                             | 1. He listens to you [ ]<br>2. He asks question [ ]<br>3. Responses appropriately [ ]<br>4. He shows concern/interest [ ]<br>5. He gives advices/suggestions [ ]<br>6. He expresses his feelings [ ]<br>7. He shows no interest [ ]   |  |
| 22. | Did you perceive any change in your husband's attitude toward you during your last pregnancy/after delivery?                                                                                                                                                                                              | 1. Yes always [ ]<br>2. Yes sometime [ ]<br>3. Not at all [ ]                                                                                                                                                                         |  |
| 23. | Was there any time you tried discussing pregnancy and delivery issues with your husband that he attempted to avoid the discussion?                                                                                                                                                                        | 1. Yes always [ ]<br>2. Yes sometime [ ]<br>3. Not at all [ ]<br>99. Don't know [ ]                                                                                                                                                   |  |
| 24. | Has there been any time that the two of you tried to avoid having a discussion on pregnancy and delivery issues?                                                                                                                                                                                          | 1. Yes always [ ]<br>2. Yes sometime [ ]<br>3. Not at all [ ]<br>99. Don't know [ ]                                                                                                                                                   |  |
| 25. | Did your husband give instruction(s) on pregnancy safety (what to do and not to do) the last time you were pregnant?                                                                                                                                                                                      | 1. Yes always [ ]<br>2. Yes sometime [ ]<br>3. Not at all [ ]<br>77. Can't remember [ ]                                                                                                                                               |  |
| 26. | Did he ask about your health during your last pregnancy and/health of the baby after delivery?                                                                                                                                                                                                            | 1. Yes always [ ]<br>2. Yes sometime [ ]<br>3. Not at all [ ]<br>77. Can't remember [ ]                                                                                                                                               |  |
| 27. | Did he seek your opinion when making decisions related to your last pregnancy/child birth? ( <b>decision on any of this: Maternal Nurition, place of ANC, Pregnancy status, Place of Birth, Transpiration etc</b> )                                                                                       | 1. Yes always [ ]<br>2. Yes sometime [ ]<br>3. Not at all [ ]<br>77. Can't remember [ ]                                                                                                                                               |  |
| 28. | <i>(if you answer to Q17 is NO, skip Q28)</i><br>Which of the following is applicable when discussing with your husband after delivery on all or any of the following issues: <b>Money matter, Use of family planning, Your health or health of the child, Nutrition, Post-natal check-up report</b> etc? | 1. He listens to you [ ]<br>2. He asks question [ ]<br>3. He responds appropriately [ ]<br>4. He shows concern/interest [ ]<br>5. He gives advices/suggestions [ ]<br>6. He expresses his feelings [ ]<br>7. He shows no interest [ ] |  |

|     |                                                                                                                                            |                         |  |
|-----|--------------------------------------------------------------------------------------------------------------------------------------------|-------------------------|--|
| 29. | Did your husband's ever present at any of your children's delivery?<br><b>(It may be, present at the delivery room or waiting outside)</b> | 1. Yes [ ]<br>2. No [ ] |  |
|-----|--------------------------------------------------------------------------------------------------------------------------------------------|-------------------------|--|

30. How will you rate discussion with your husband on the following issues/items?

| S/N | ISSUES                                                                    | Excellent | Good | Fair | Poor |
|-----|---------------------------------------------------------------------------|-----------|------|------|------|
| A.  | Money matters during pregnancy                                            |           |      |      |      |
| B.  | Number of children to have as a family                                    |           |      |      |      |
| C.  | Use family planning after delivery                                        |           |      |      |      |
| D.  | Your Health/pregnancy status                                              |           |      |      |      |
| E.  | Good Nutrition during pregnancy and after delivery or Breastfeed the baby |           |      |      |      |
| F.  | Reducing work load during pregnancy and/after delivery                    |           |      |      |      |
| G.  | Reminder of Check-up/clinic date                                          |           |      |      |      |

### SECTION C: USE OF MATERNAL CARE SERVICES

| S/N | Statement                                                                   | Coding Categories                                              | Skip                           |
|-----|-----------------------------------------------------------------------------|----------------------------------------------------------------|--------------------------------|
| 31. | At the time of your last pregnancy, were you ready for it?                  | 1. Yes [ ]<br>2. No [ ]                                        | <i>If Yes skip to Q33</i>      |
| 32. | If No, Did you want the pregnancy or you don't want any more child?         | 1. Later [ ]<br>2. No more [ ]                                 |                                |
| 33. | Are you currently using any contraceptive method?                           | 1. Yes always [ ]<br>2. Yes Sometimes [ ]<br>3. Not at all [ ] | <i>If Any Yes, skip to Q36</i> |
| 34. | Is there any reason for not using contraceptive method?                     | 1. Yes [ ]<br>2. No [ ]                                        | <i>If No skip to Q3</i>        |
| 35. | What is/are the reasons for not using contraceptive method?                 | .....                                                          | <i>Skip to Q38</i>             |
| 36. | Is your husband aware that you are using contraceptive method?              | 1. Yes always [ ]<br>2. Yes Sometime [ ]<br>3. Not at all [ ]  |                                |
| 37. | Is it joint decision for you to use contraceptive method with your husband? | 1. Yes always [ ]<br>2. Yes Sometime [ ]<br>3. Not at all [ ]  |                                |
|     | Do you agree there is a need for antenatal care during pregnancy?           | 1. Strongly agree [ ]<br>2. Agree [ ]<br>3. Disagree [ ]       |                                |

|     |                                                                                                                                        |                                                                                                                                                                                                         |  |
|-----|----------------------------------------------------------------------------------------------------------------------------------------|---------------------------------------------------------------------------------------------------------------------------------------------------------------------------------------------------------|--|
| 38. |                                                                                                                                        | 4. Strongly disagree [ ]<br>99. Don't know [ ]                                                                                                                                                          |  |
| 39. | Did you receive antenatal care for your last pregnancy?                                                                                | 1. Yes [ ]<br>2. No [ ]<br>77. Can't remember [ ]                                                                                                                                                       |  |
| 40. | Who initiated when to start antenatal care during your last pregnancy?                                                                 | 1. My Husband [ ]<br>2. Myself [ ]<br>3. Me and my Husband [ ]<br>4. Mother-in-law [ ]<br>5. Some else [ ], Specify .....<br>77. Can't remember [ ]                                                     |  |
| 41. | Who decided on where to attend antenatal care services during your last pregnancy?                                                     | 1. My Husband [ ]<br>2. Myself [ ]<br>3. Me and My Husband [ ]<br>4. Mother-in-law [ ]<br>5. Someone else [ ], Specify ....<br>77. Can't remember [ ]                                                   |  |
| 42. | Where did you receive antenatal care for your last pregnancy?<br><i>*Home may be your house, Doctor/Nurse house, friend house etc*</i> | 1. Home [ ]<br>2. Traditional Birth Attendant [ ]<br>3. Private Hospital/Clinic [ ]<br>4. Government Hospital/Clinic [ ]<br>5. Faith House/Religious House/Place [ ]<br>88. Others [ ], (specify) ..... |  |
| 43. | How many time(s) did you attend antenatal clinic during your last pregnancy?                                                           | 1. One time [ ]<br>2. Two times [ ]<br>3. Three times [ ]<br>4. Four or more times [ ]<br>77. Can't remember [ ]                                                                                        |  |
| 44. | Who usually make decision about your health and delivery issues during your last pregnancy                                             | 1. My Husband [ ]<br>2. Myself [ ]<br>3. Me and My Husband [ ]<br>4. Mother-in-law [ ]<br>5. Someone else [ ], Specify ...<br>77. Can't remember [ ]                                                    |  |
| 45. | Did your husband encourage you to go for regular check-ups during your last pregnancy?                                                 | 1. Yes always [ ]<br>2. Yes Sometime [ ]<br>3. Not at all [ ]<br>77. Can't remember [ ]                                                                                                                 |  |
| 46. | How often did your husband ask for feedback/Doctor's report from your antenatal and postnatal visit?                                   | 1. Yes always [ ]<br>2. Yes Someone [ ]<br>3. Not at all [ ]<br>77. Can't remember [ ]                                                                                                                  |  |
| 47. | Where did you give birth to your youngest child?                                                                                       | 1. Home [ ]<br>2. Traditional Birth Attendant [ ]<br>3. Private Hospital/Clinic [ ]                                                                                                                     |  |

|     |                                                                                       |                                                                                                                             |  |
|-----|---------------------------------------------------------------------------------------|-----------------------------------------------------------------------------------------------------------------------------|--|
|     | <i>*Home may be your house, Doctor/Nurse house, Friend house etc*</i>                 | 4. Government Hospital/Clinic [ ]<br>5. Faith House/Religious House/Place [ ]<br>88. Others [ ], (specify) .....            |  |
| 48. | Who made the decision on where to have the birth of your last child?                  | 1. My Husband [ ]<br>2. Myself [ ]<br>3. Me and my Husband [ ]<br>4. Some else [ ], Specify .....<br>77. Can't remember [ ] |  |
| 49. | In the last 12 months, have you visited a health facility for care of yourself/child? | 1. Yes always [ ]<br>2. Yes Sometime [ ]<br>3. Not at all [ ]                                                               |  |

- 50.** Which of the following is applicable: Which of these did you discuss or prepare with your husband during your last pregnancy (birth preparedness)?

***Mark as many as possible***

| S/N | Items                                                        | Yes | No |
|-----|--------------------------------------------------------------|-----|----|
| A   | Arrangement of money for normal and special circumstances    |     |    |
| B   | Preparation for people who can donate blood during emergency |     |    |
| C   | Transportation                                               |     |    |
| D   | Birth attendant                                              |     |    |
| E   | Others (specify) .....                                       |     |    |

#### **SECTION D: DESIRED AND UNDESIRED AREAS DURING MATERANAL HEALTH CARE**

- 51.** Which of the following activities/areas did you expect your husband's involvement during your last pregnancy and/after delivery?

| S/N | Expectation/Desire                                                 | Yes always | Yes sometime | Not at all |
|-----|--------------------------------------------------------------------|------------|--------------|------------|
| A   | Financial support                                                  |            |              |            |
| B   | Accompany you to antenatal care services                           |            |              |            |
| C   | Occasionally attend antenatal care with you                        |            |              |            |
| D   | To be part of health talk at maternity                             |            |              |            |
| E   | Presence at delivery (either Waiting outside/inside delivery room) |            |              |            |
| F   | Help feeding to baby                                               |            |              |            |
| G   | Help carrying baby when crying                                     |            |              |            |
| H   | Help in domestic work                                              |            |              |            |
| I   | Hire house help                                                    |            |              |            |
| J   | Others specify .....                                               |            |              |            |

**52.** Which of the following activities/areas did you husband get involved during your last pregnancy and/after delivery?

| S/N | Fulfillment                                                                        | Yes always | Yes sometime | Not at all |
|-----|------------------------------------------------------------------------------------|------------|--------------|------------|
| A   | Did he rendered financial support                                                  |            |              |            |
| B   | Did he accompanied you to antenatal care services                                  |            |              |            |
| C   | Did he occasionally attend antenatal care with you                                 |            |              |            |
| D   | Did he took part in health talk at maternity with you                              |            |              |            |
| E   | Did he attended any of your delivery (either Waiting outside/inside delivery room) |            |              |            |
| F   | Did he helped in feeding the baby                                                  |            |              |            |
| G   | Did he helped carrying baby when crying                                            |            |              |            |
| H   | Did he helped in domestic work                                                     |            |              |            |
| I   | Did he engaged the services of a house-help                                        |            |              |            |
| J   | Others specify .....                                                               |            |              |            |

| S/N | Questions                                                                                                                                    | Coding Categories                                                                                                                         | Skip |
|-----|----------------------------------------------------------------------------------------------------------------------------------------------|-------------------------------------------------------------------------------------------------------------------------------------------|------|
| 53. | <i>(If Not at all in all Q52, Skip to Q55)</i><br>For how long did he render some/all of these activities/support during your last pregnancy | 1. A Week [ ]<br>2. Two Weeks [ ]<br>3. A month [ ]<br>4. More than a month [ ]<br>5. Anytime you need help [ ]<br>77. Can't remember [ ] |      |
| 54. | For how long did he render some/all of these activities/support after your delivery/child birth?                                             | 1. A Week [ ]<br>2. Two Weeks [ ]<br>3. A month [ ]<br>4. More than a month [ ]<br>5. Anytime you need help [ ]<br>77. Can't remember [ ] |      |

**55. Perceived Benefit of Spousal Communication and Support**

| S/N | QUESTIONS                                                                           | YES | NO | UNCERTAIN |
|-----|-------------------------------------------------------------------------------------|-----|----|-----------|
| A   | Do you think your husband advice during pregnancy has effect on pregnancy outcome   |     |    |           |
| B   | Do you think your husband presence during delivery serve as a form of help for you? |     |    |           |
| C   | Do you think your husband prayer has effect on the delivery?                        |     |    |           |
| D   | Do you think your husband financial support has effect on pregnancy outcome?        |     |    |           |

56. Which of the following factors below that hinder discussion/communication with your husband during your last pregnancy and/delivery/child birth? **Tick many as possible**

- a) Male being preoccupied with work [ ]
- (b) Males believe ANC is a concern of the wife only [ ]
- (c) Do not know pregnancy could result in complication [ ]
- (d) Males do not feel responsible [ ]
- (e) Males feel shame [ ]
- (f) Women do not allow their partner to accompany [ ]
- (g) They do not know the reason [ ]

**Thank**
